# Supplementary material
Source: PubMed Central journal article supplement (PMC9755524)
Supplement: 42003_2022_4322_MOESM3_ESM.pdf [file 42003_2022_4322_MOESM3_ESM.pdf]

## Description of Additional Supplementary Files

**File name:** Supplementary Data 1

**Description:** The source data behind graph of Figure 1.

**File name:** Supplementary Data 2

**Description:** The source data behind graphs of Figure 3, 4 and S2.
